# Supplementary material
Source: PubMed Central journal article supplement (PMC10466502)
Supplement: NIHMS1896416-supplement-Supplementary_Figure_1.pdf [file NIHMS1896416-supplement-Supplementary_Figure_1.pdf]

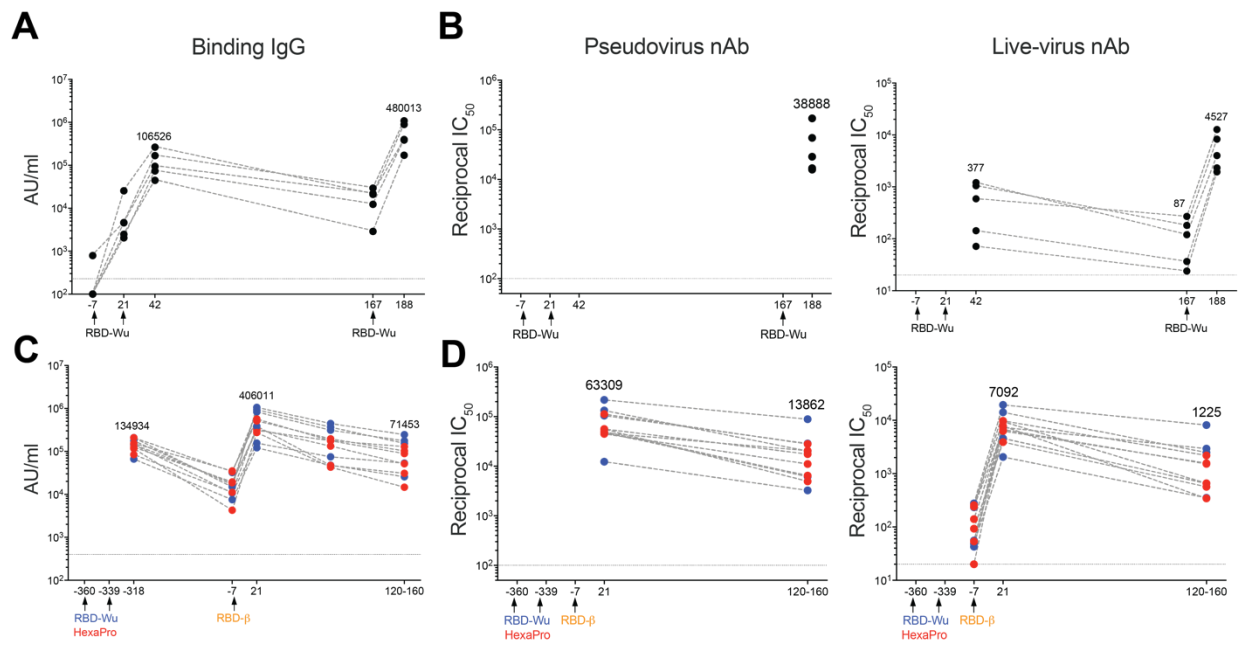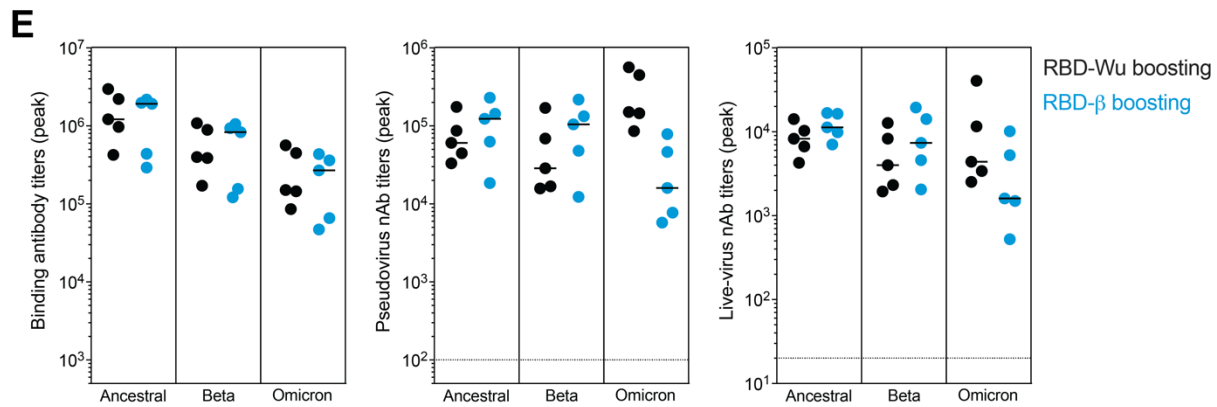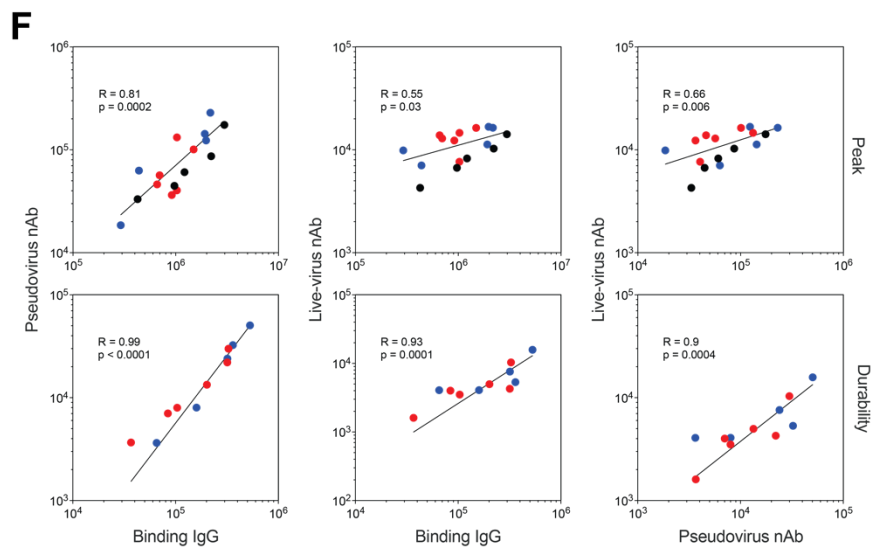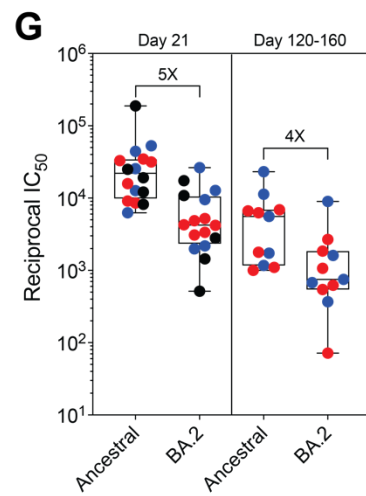

**Figure S1. Serum antibody responses are induced by AS03-adjuvanted receptor binding domain (RBD)-nanoparticle vaccination. (A and B)** Binding IgG (A) and neutralizing antibody (B) responses against the Beta variant in the RBD-Wu/RBD-Wu/RBD-Wu group are shown. AU/ml, Arbitrary Units per ml;  $IC_{50}$ , half maximal inhibitory concentration; nAb, neutralizing antibody. **(C and D)** Binding IgG (C) and neutralizing antibody (D) responses against the Beta variant in the RBD-Wu/RBD-Wu/RBD- $\beta$  (blue) and /HexaPro/RBD- $\beta$  groups (red) are shown. The numbers indicate geometric mean titers. **(E)** Antibody titers were measured in the animals immunized with RBD-Wu/RBD-Wu/RBD-Wu (black, n = 5) or RBD-Wu/RBD-Wu/RBD- $\beta$  (blue, n = 5). Horizontal bars indicate Median. **(F)** Spearman's correlations between Spike protein-binding IgG, pseudovirus nAb, and live-virus nAb titers are shown. **(G)** Pseudovirus neutralizing antibody responses against the ancestral strain and the Omicron subvariant BA.2 are shown. Each dot represents an animal (RBD-Wu/RBD-Wu/RBD-Wu (black), RBD-Wu/RBD-Wu/RBD- $\beta$  (blue) and HexaPro/HexaPro/RBD- $\beta$  groups (red)). Data are presented as box plots in which the boxes show median and 25<sup>th</sup> to 75<sup>th</sup> percentiles and the whiskers show the range.
