# Supplementary material
Source: PubMed Central journal article supplement (PMC10466502)
Supplement: NIHMS1896416-supplement-Supplementary_Figure_2.pdf [file NIHMS1896416-supplement-Supplementary_Figure_2.pdf]

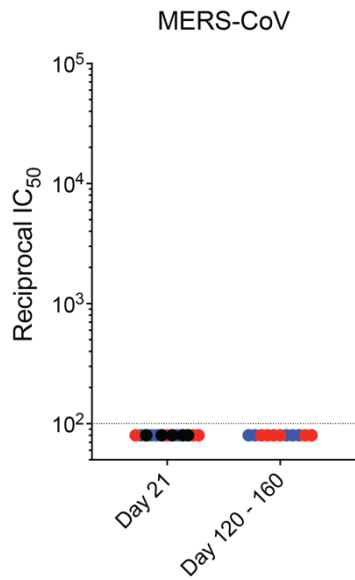

**Figure S2. Live-virus neutralization titers against MERS-CoV.** Each dot represents an animal (RBD-Wu/RBD-Wu/RBD-Wu (black), RBD-Wu/RBD-Wu/RBD- $\beta$  (blue) and HexaPro/HexaPro/RBD- $\beta$  groups (red)). Day 21 and 120-160 represent peak and durability time points after the third immunization. The dotted horizontal line indicates limit of detection.
