# Supplementary material
Source: PubMed Central journal article supplement (PMC10466502)
Supplement: NIHMS1896416-supplement-Supplementary_Figure_4.pdf [file NIHMS1896416-supplement-Supplementary_Figure_4.pdf]

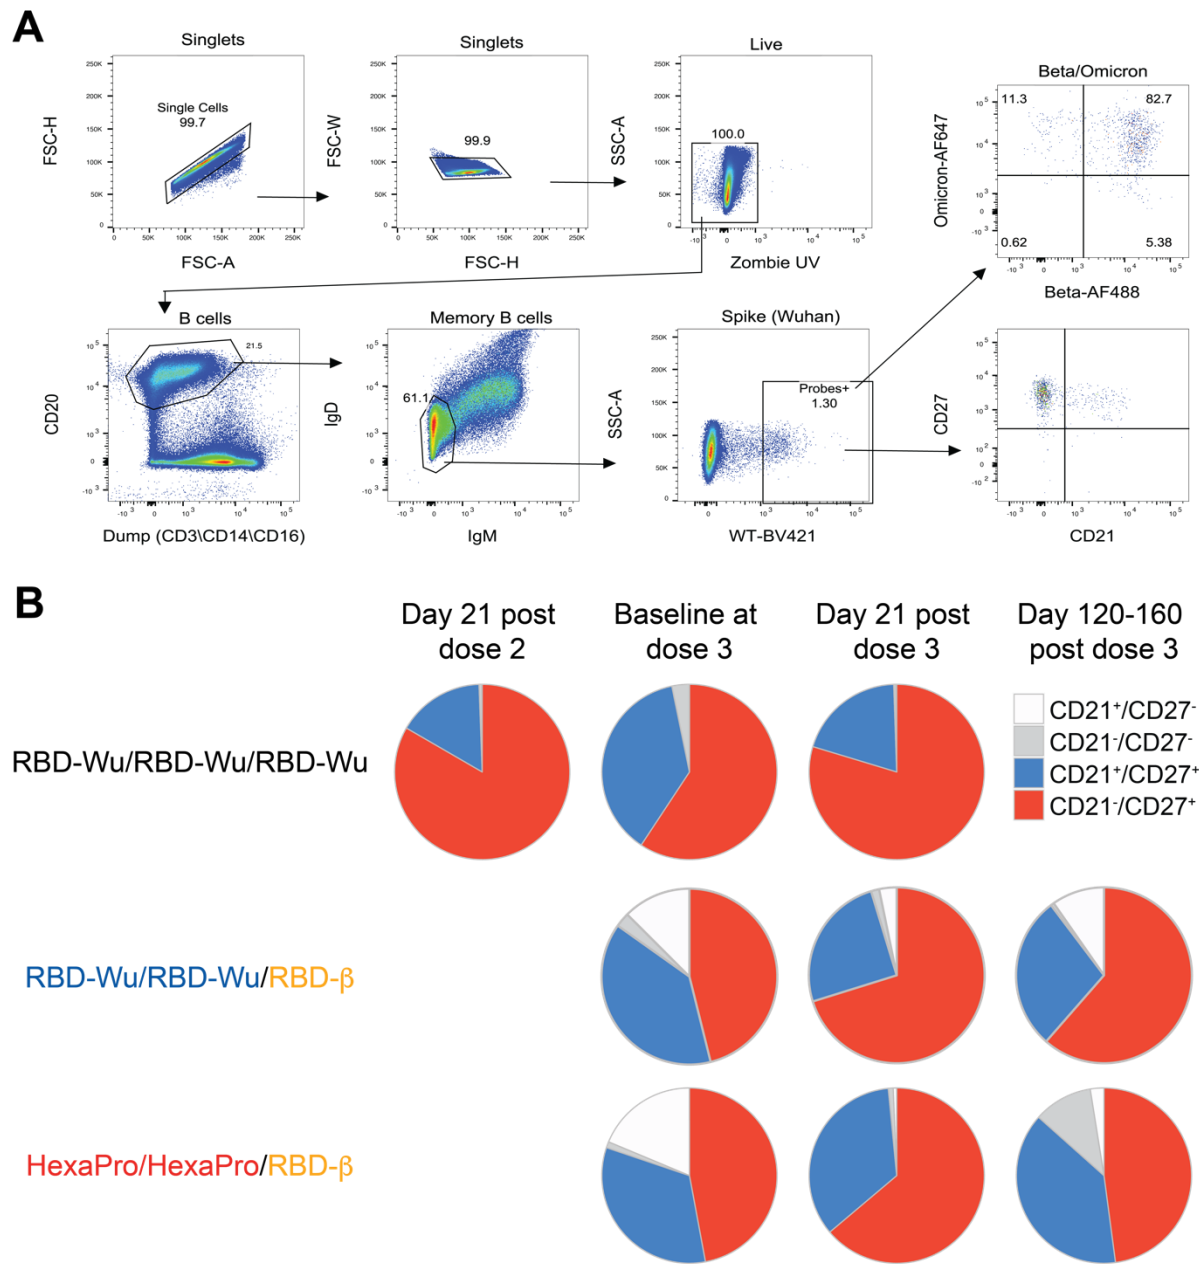

**Figure S4. Memory B cell responses are induced by AS03-adjuvanted RBD-nanoparticle vaccination.** (A) The flow cytometry gating strategy to identify Spike protein-specific memory B cells is shown. FSC-H, forward scatter height. FSC-A, forward scatter area; FSC-W, forward scatter width; SSC-A, side scatter area; UV, ultraviolet; AF, alexa fluor; BV, brilliant violet. (B)

Pie charts show the proportion of Spike protein-specific memory B cells expressing CD21 and CD27 as indicated in the legend.
