# Supplementary material
Source: PubMed Central journal article supplement (PMC10466502)
Supplement: NIHMS1896416-supplement-Supplementary_Figure_5.pdf [file NIHMS1896416-supplement-Supplementary_Figure_5.pdf]

**A**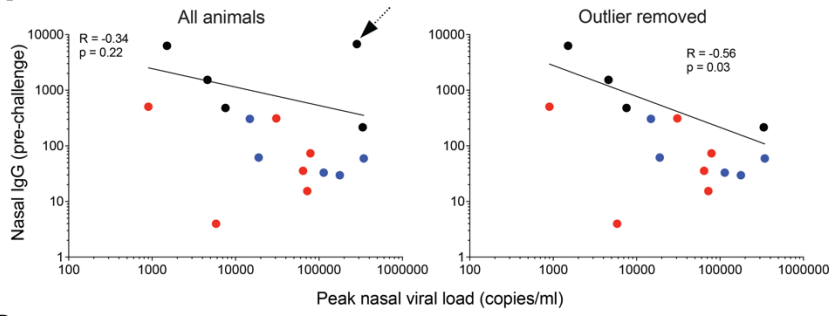**B**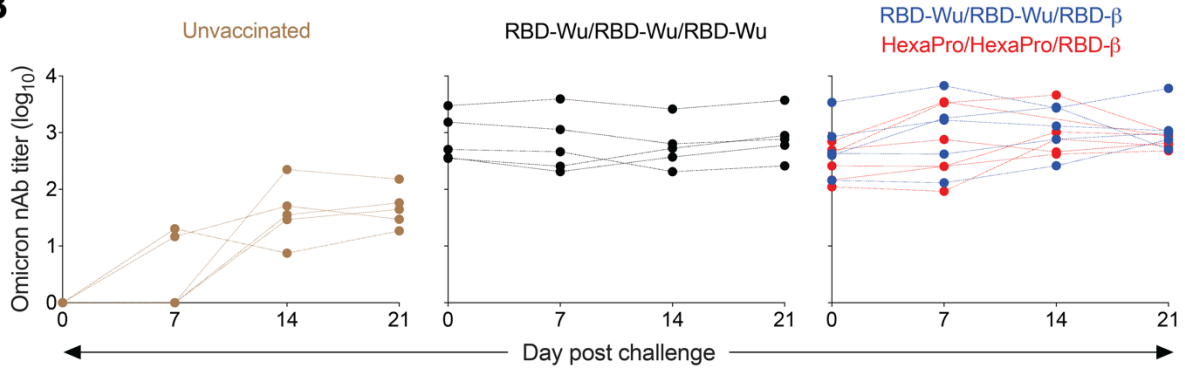**C**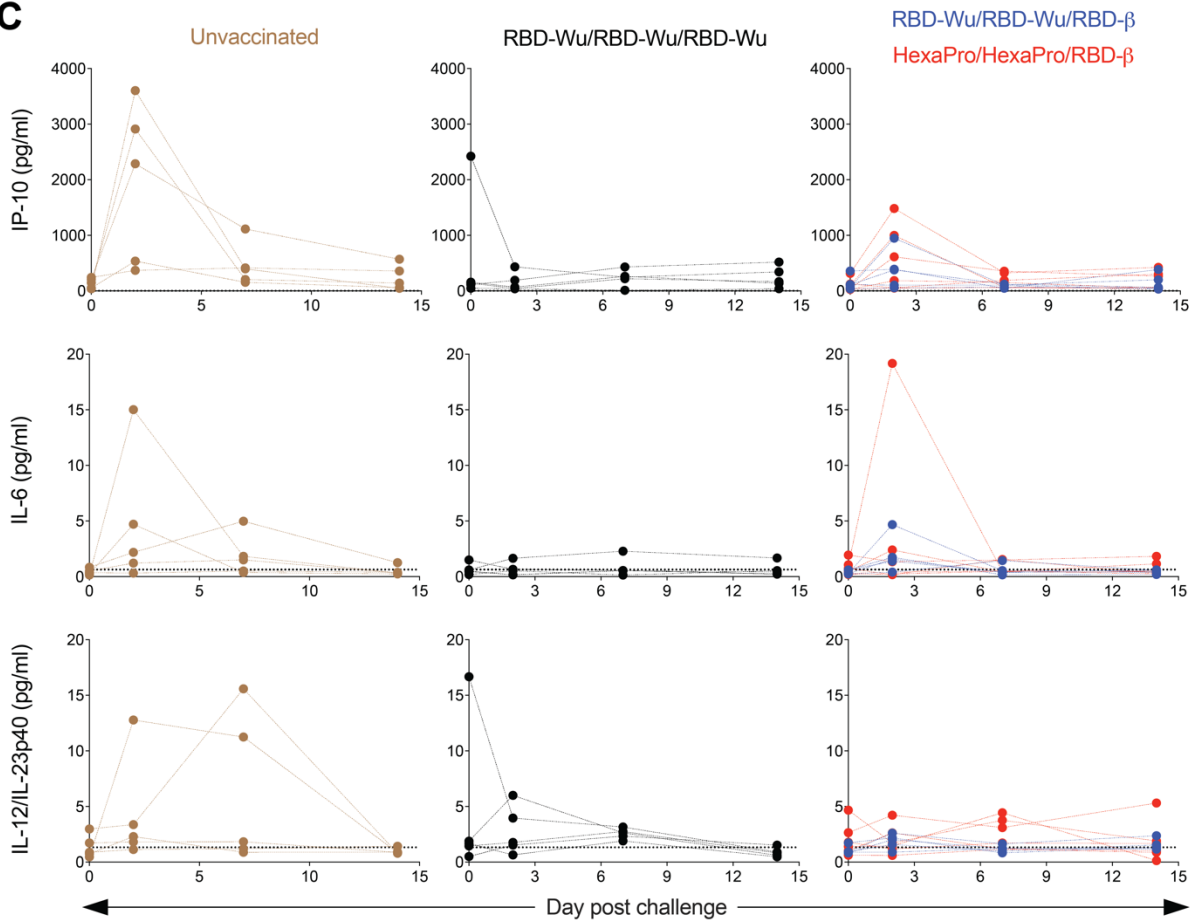

**Figure S5. Antibody and cytokine response post-challenge.** (A) Spearman's correlation between peak viral load in the nares and nasal IgG are shown. (B) Neutralizing antibody titers against Omicron in serum were measured at the indicated time points post challenge. (B) Cytokine responses in the bronchoalveolar lavage (BAL) fluid were measured using the Mesoscale discovery cytokine assay.
