# Supplementary material
Source: PubMed Central journal article supplement (PMC10466502)
Supplement: NIHMS1896416-supplement-Supplementary_Figure_6.pdf [file NIHMS1896416-supplement-Supplementary_Figure_6.pdf]

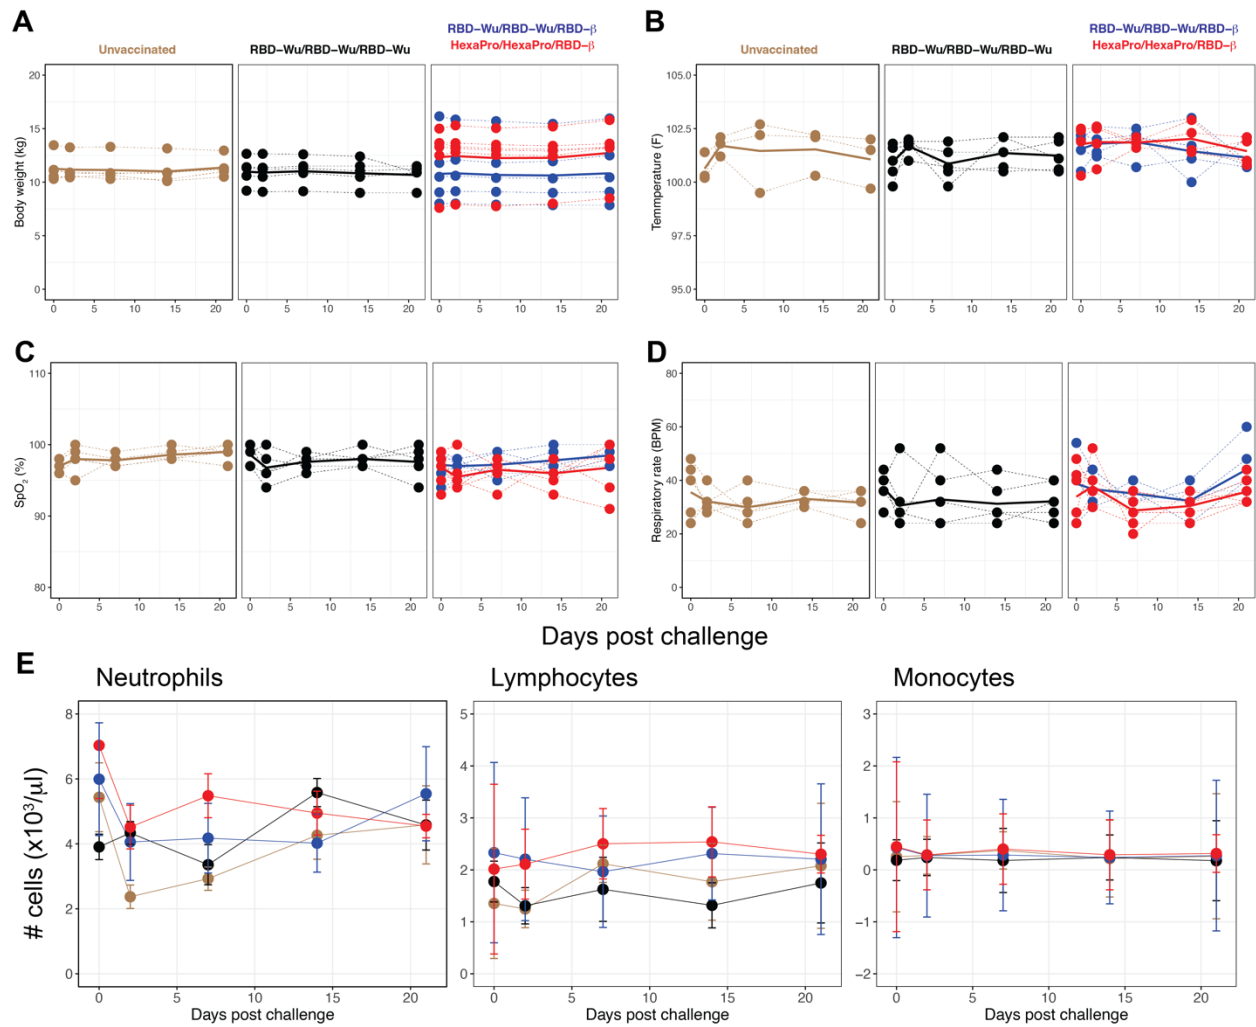

**Figure S6. Clinical parameters assessing symptoms post challenge.** (A to D) Body weight (A), rectal temperature (B), oxygen saturation (C) and respiratory rate (D) were measured post-challenge at time points indicated on the X-axes. Each dot represents an animal. Data on rectal temperature from 2 unvaccinated animals and 3 animals in the durability challenge group are unavailable. (E) Complete blood counts of different cell types measured in whole blood are shown. Shown are geometric mean values of animals in each group with SEM.
