# Supplementary material
Source: PubMed Central journal article supplement (PMC10466502)
Supplement: NIHMS1896416-supplement-Supplementary_Table_1.pdf [file NIHMS1896416-supplement-Supplementary_Table_1.pdf]

**Table S1. Antibodies used in the ICS assay.**

| Fluorochrome | Antibody            | Vendor         | Catalog#   | Clone     | Reaction    | Volume per reaction ( $\mu$ l) |
|--------------|---------------------|----------------|------------|-----------|-------------|--------------------------------|
| FITC         | IL-2                | Biolegend      | 500304     | MQ1-17H12 | ICS         | 2                              |
| PerCP-eF710  | CXCR5               | Invitrogen     | 46-9185-42 | MU5UBEE   | Stimulation | 2.5                            |
| PE           | IL-4                | BioLegend      | 500810     | MP4-25D2  | ICS         | 1                              |
| PE-CF594     | CD45RA              | BD Biosciences | 565419     | 5H9       | Surface     | 2                              |
| PE-Cy7       | TNF                 | E-Bioscience   | 25-7349-82 | Mab11     | ICS         | 0.3                            |
| BV421        | CD40L               | Biolegend      | 310824     | 24-31     | ICS         | 2                              |
| BV506        | TCR- $\gamma\delta$ | Biolegend      | 331220     | B1.1      | Surface     | 2.5                            |
| BV605        | CD4                 | Biolegend      | 317438     | OKT4      | Surface     | 1.5                            |
| BV650        | CD3                 | BD Biosciences | 563916     | SP34-2    | Surface     | 2.5                            |
| BV711        | CCR7                | Biolegend      | 353228     | G043H7    | Surface     | 2                              |
| BV785        | CD127               | Biolegend      | 351330     | A019D5    | Surface     | 2.5                            |
| APC          | IL-21               | BioLegend      | 513008     | 3A3-N2    | ICS         | 2.5                            |
| AF700        | IFN- $\gamma$       | Biolegend      | 502520     | 4S.B3     | ICS         | 1                              |
| APC-Cy7      | CD25                | Biolegend      | 302614     | BC96      | Surface     | 2                              |
| BUV395       | CXCR3               | BD Biosciences | 565223     | 1C6/CXCR3 | Stimulation | 2.5                            |
| BUV563       | CD8                 | BD Biosciences | 612914     | RPA-T8    | Surface     | 2                              |
| BUV737       | CCR6                | BD Biosciences | 612780     | 11A9      | Surface     | 2                              |
| BUV805       | CD69                | BD Biosciences | 748763     | FN50      | Surface     | 2                              |

FITC, Fluorescein isothiocyanate; PE-CF594, Phycoerythrin – Cyanine based fluorescent dye 594; Cy7, Cyanine 7; APC – Allophycocyanin; BUV – Brilliant Ultraviolet. CXCR – CXC motif chemokine receptor; TCR – T cell Receptor; CCR – C-C motif chemokine receptor. ICS – Intracellular cytokine staining.
